# Supplementary material for: A catalogue of biochemically diverse CRISPR-Cas9 orthologs
Source: PubMed Central journal article supplement (PMC7606464; doi:10.1038/s41467-020-19344-1), 2020-11-02
Supplement: 41467_2020_19344_MOESM1_ESM.pdf [file 41467_2020_19344_MOESM1_ESM.pdf]

## Supplementary Figures

### Biochemically diverse CRISPR-Cas9 orthologs

Giedrius Gasiunas, Joshua K. Young, Tautvydas Karvelis, Darius Kazlauskas, Tomas Urbaitis, Monika Jasnauskaite, Mantvyda Grusyte, Sushmitha Paulraj, Po-Hao Wang, Zhenglin Hou, Shane K. Dooley, Mark Cigan, Clara Alarcon, N. Doane Chilcoat, Greta Bigelyte, Jennifer L. Curcuru, Megumu Mabuchi, Zhiyi Sun, Ryan T. Fuchs, Ezra Schildkraut, Peter R. Weigele, William E. Jack, G. Brett Robb, Česlovas Venclovas, and Virginijus Siksnys

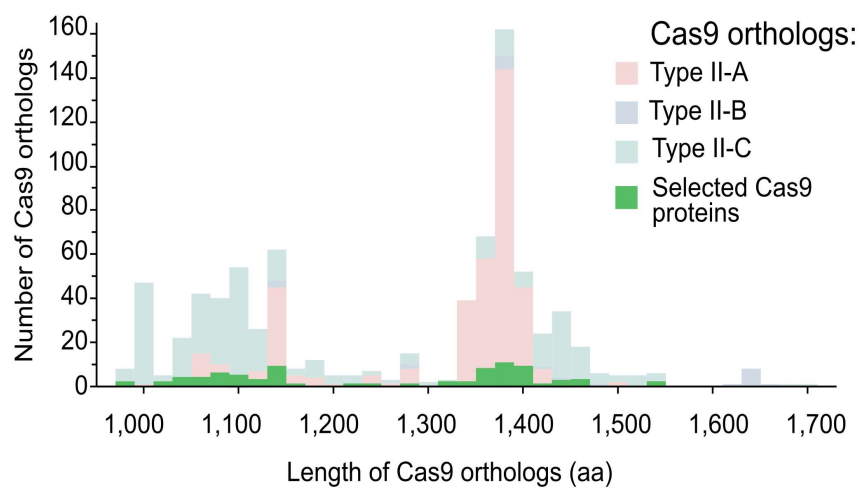

**Supplementary Fig. 1. Cas9 protein size distribution according to subtype.** Type II-A, B, and C systems are color-coded, red, blue, and turquoise, respectively. The numbers of analysed Cas9s in each group are indicated in green.

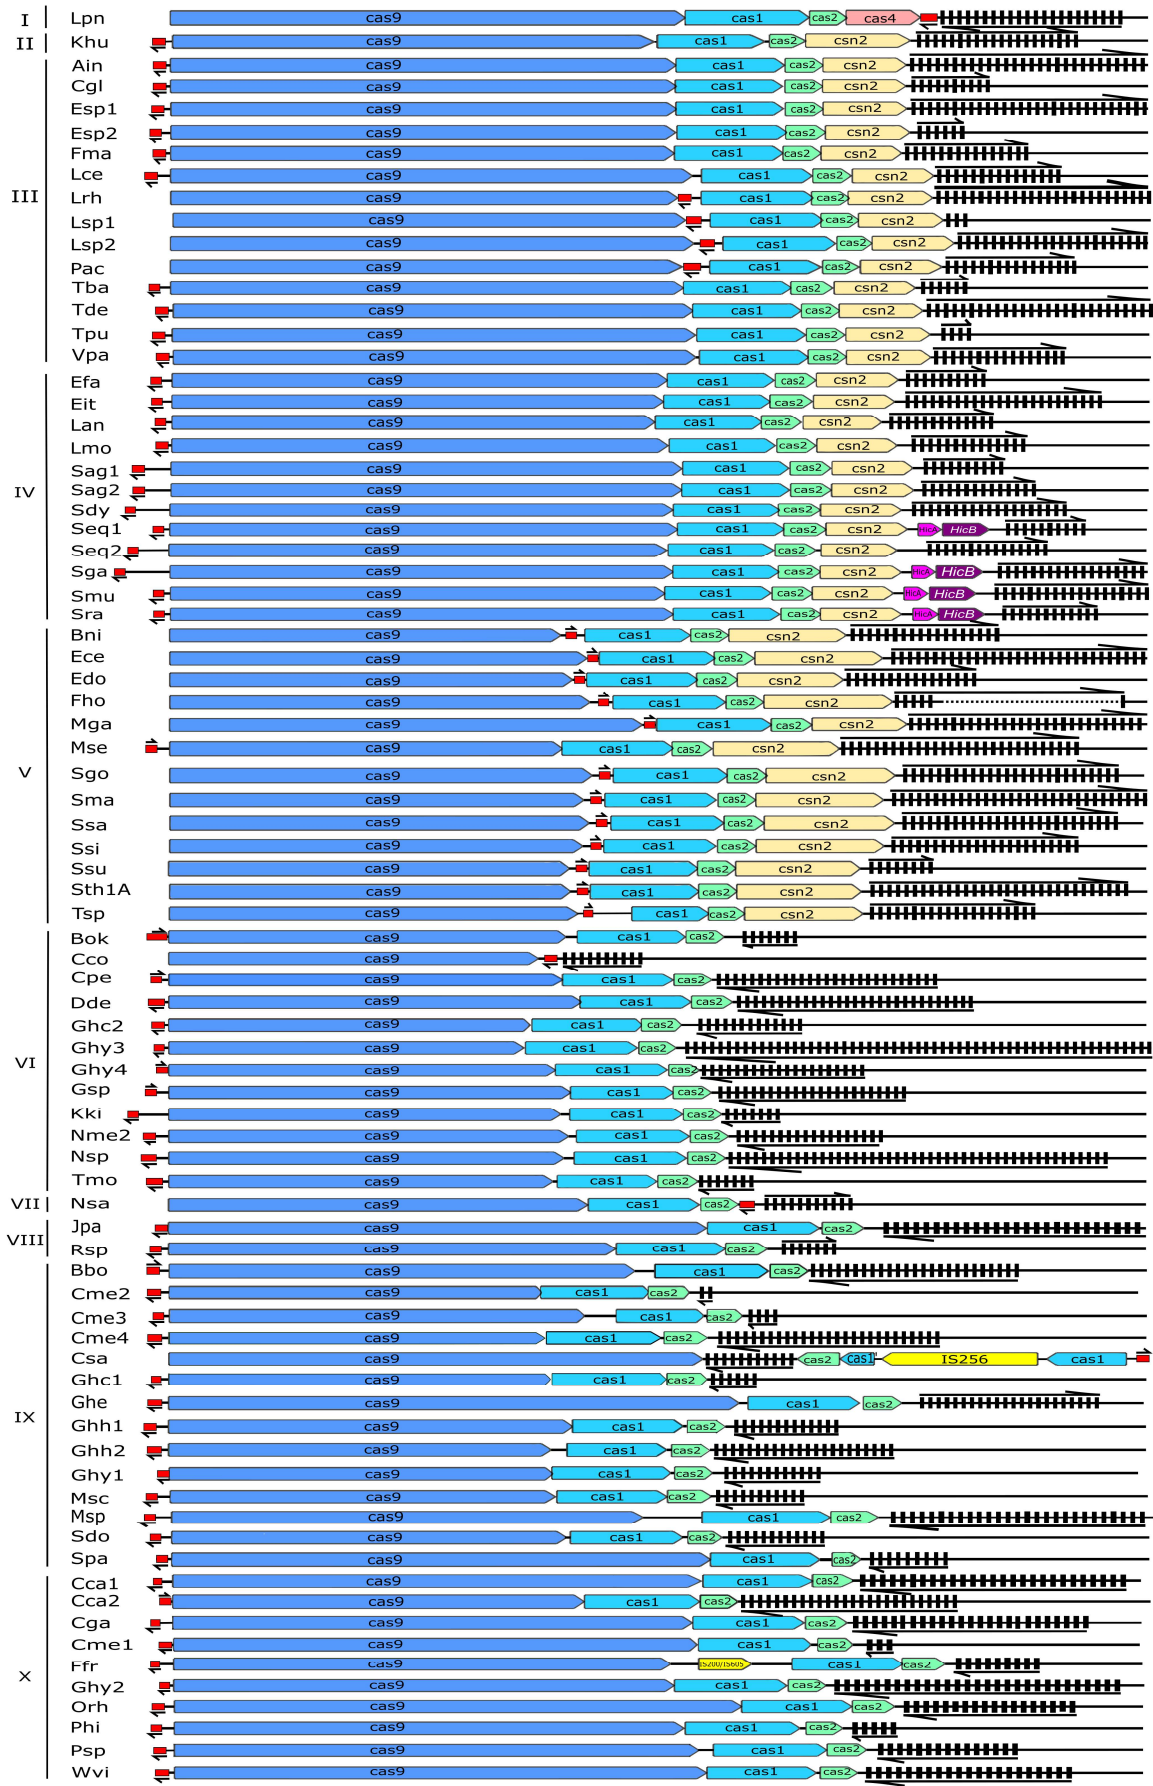

**Supplementary Fig. 2. Schematic representation of the CRISPR-Cas loci encoding the Cas9 orthologs characterized in this study.** Cas9 and tracrRNA encoding sequences are colored in blue and red accordingly. Predicted transcriptional directions of the tracrRNA and CRISPR arrays are indicated by arrows. Clade membership is indicated with roman numerals. Additional genes, *cas1*, *cas2*, *csn2* and *cas4*, are color-coded in cyan, green, yellow, and pink, respectively.

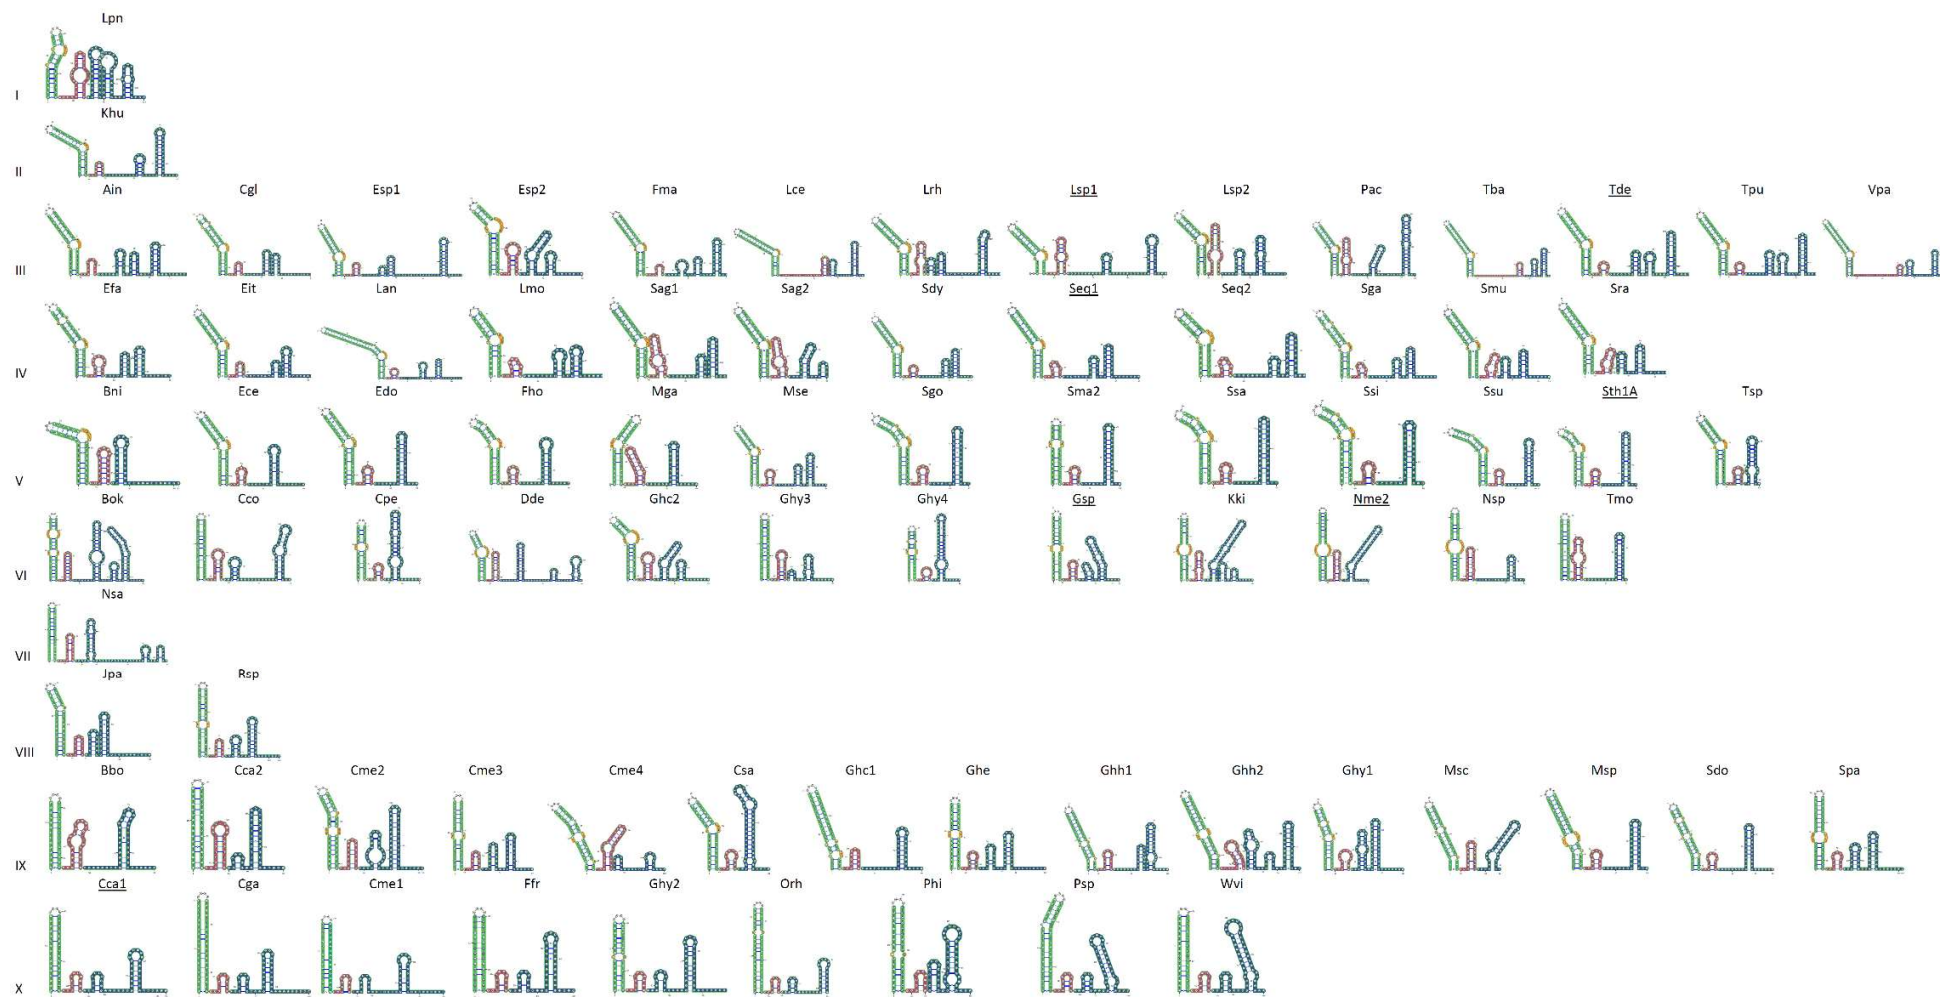

**Supplementary Fig. 3. Predicted guide RNA secondary structures for the Cas9 orthologs described in this study.** Phylogenetic clade membership is indicated with roman numerals. The single guide RNA (sgRNA) structures can be classified into at least 6 groups based on structural prediction and exemplified by Tde, Seq1 (Spy-like), Sth1A, Nme2, Nsa and Cca1 (names are underlined). Main structural elements are color-coded: repeat:anti-repeat duplex is indicated in green, the nexus in purple and 3' tracrRNA hairpin(s) in blue. Secondary structures of tracrRNA visualized with Varna v 3-93<sup>1</sup>

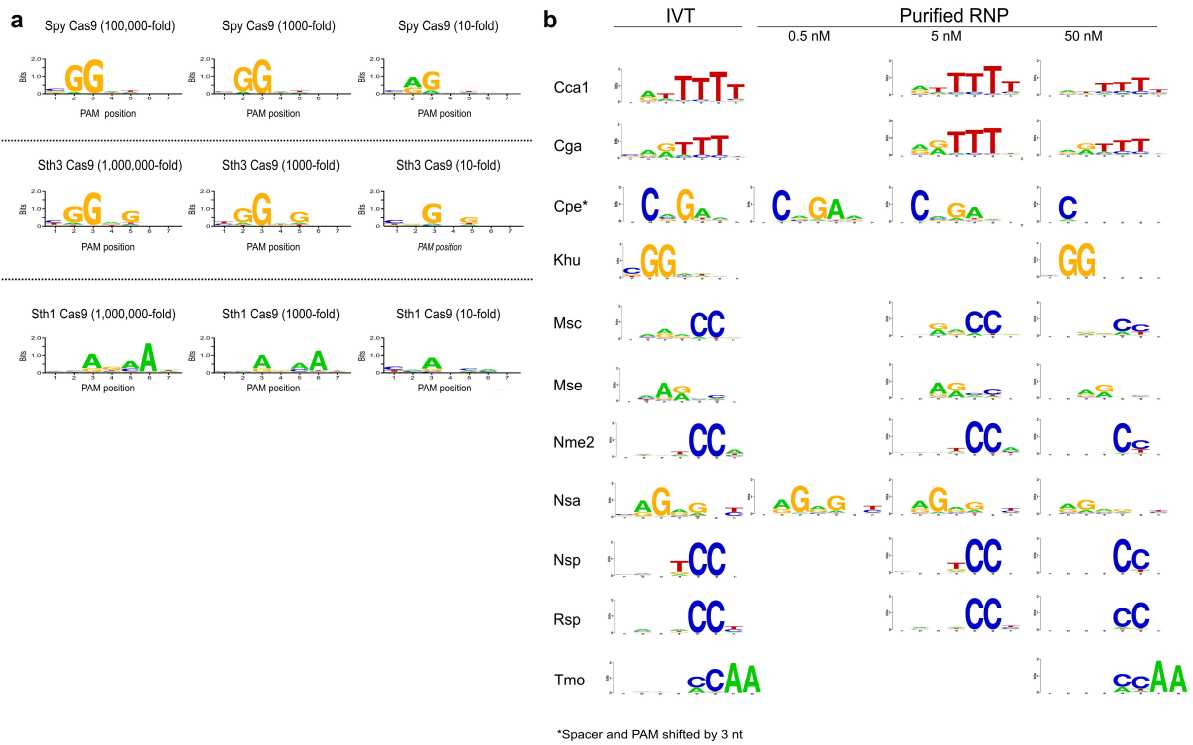

**Supplementary Fig.4. Verification of IVT-based methods for characterizing Cas9 PAM recognition.**  
**a** PAM preferences for Spy, Sth3 and Sth1 Cas9 proteins using different dilutions of *in vitro* translated (IVT) ribonucleoprotein (RNP) mixtures. **b** PAM recognition for 11 new orthologs assayed using both IVT and purified RNP.

**a** Query C7\_ID46\_\_WP\_148224960.1\_\_ADV46720.1  
 Match\_columns 306  
 No\_of\_seqs 35 out of 39  
 Neff 3.64315  
 Searched\_HMMs 49849  
 Date Fri Jan 24 13:02:17 2020  
 Command hhsearch -cpu 8 -i ../results/full.a3m -d /cluster/toolkit/production/databases/hh-suite/mmcif70/pdb70 -o ../results/9327865\_5.hhr -oa3m ../results/9327865\_5.a3m -p 20 -Z 250 -loc -z 1 -b 1 -B 250 -ssm 2 -sc 1 -seq 1 -dbstrlen 10000 -norealign -maxres 32000 -contxt /cluster/toolkit/production/bioprogs/tools/hh-suite-build/data/context\_data.crf

| No Hit | Prob   | E-value                 | P-value | Score   | SS      | Cols | Query | HMM | Template | HMM            |
|--------|--------|-------------------------|---------|---------|---------|------|-------|-----|----------|----------------|
| 1      | 5CZZ_A | CRISPR-associated endon | 96.9    | 0.00033 | 6.7E-09 | 76.1 | 12.0  | 226 | 5-274    | 774-1041(1056) |
| 2      | 6KC8_A | CRISPR-associated endon | 96.5    | 0.0038  | 7.7E-08 | 68.4 | 15.2  | 200 | 8-274    | 830-1070(1083) |
| 3      | 6RJA_C | AcIIA6, CRISPR-associa  | 96.2    | 0.0088  | 1.8E-07 | 66.0 | 14.2  | 250 | 5-274    | 810-1107(1121) |
| 4      | 6J00_A | CRISPR-associated prote | 87.5    | 1.2     | 2.3E-05 | 48.9 | 6.1   | 119 | 4-180    | 645-770 (927)  |
| 5      | 5X2H_A | CRISPR-associated endon | 86.8    | 1.7     | 3.4E-05 | 47.1 | 6.8   | 79  | 193-274  | 737-822 (835)  |
| 6      | 5TGY_A | PS1; 4-helix bundle, co | 39.6    | 2.1E+02 | 0.0043  | 24.1 | 6.6   | 70  | 54-125   | 31-100 (109)   |

**b** Query C8\_WP\_087368840.1  
 Match\_columns 299  
 No\_of\_seqs 103 out of 122  
 Neff 5.0316  
 Searched\_HMMs 49849  
 Date Fri Jan 24 12:53:48 2020  
 Command hhsearch -cpu 8 -i ../results/full.a3m -d /cluster/toolkit/production/databases/hh-suite/mmcif70/pdb70 -o ../results/9327865\_2.hhr -oa3m ../results/9327865\_2.a3m -p 20 -Z 250 -loc -z 1 -b 1 -B 250 -ssm 2 -sc 1 -seq 1 -dbstrlen 10000 -norealign -maxres 32000 -contxt /cluster/toolkit/production/bioprogs/tools/hh-suite-build/data/context\_data.crf

| No Hit | Prob   | E-value                 | P-value | Score   | SS      | Cols  | Query | HMM | Template | HMM            |
|--------|--------|-------------------------|---------|---------|---------|-------|-------|-----|----------|----------------|
| 1      | 5CZZ_A | CRISPR-associated endon | 99.8    | 8.5E-23 | 1.7E-27 | 220.1 | 16.6  | 230 | 46-296   | 768-1055(1056) |
| 2      | 6KC8_A | CRISPR-associated endon | 99.6    | 2E-17   | 4E-22   | 179.3 | 18.7  | 264 | 1-283    | 772-1071(1083) |
| 3      | 40GE_A | HNH endonuclease domain | 99.1    | 7.2E-13 | 1.4E-17 | 144.6 | 10.1  | 226 | 37-293   | 776-1097(1101) |
| 4      | 6J00_A | CRISPR-associated prote | 97.9    | 1.3E-06 | 2.7E-11 | 94.6  | 12.9  | 239 | 27-293   | 622-923 (927)  |
| 5      | 5X2H_A | CRISPR-associated endon | 97.8    | 2.3E-06 | 4.7E-11 | 91.7  | 13.2  | 177 | 42-283   | 616-823 (835)  |
| 6      | 6RJA_C | AcIIA6, CRISPR-associa  | 97.2    | 0.00038 | 7.6E-09 | 77.2  | 18.1  | 213 | 42-283   | 798-1108(1121) |
| 7      | 3BID_H | UPF0339 protein NMB1088 | 35.9    | 78      | 0.0016  | 23.0  | 3.3   | 18  | 174-191  | 2-19 (64)      |

**c** Query C9\_NCBI\_ASHW01000120:2294253111\_16  
 Match\_columns 232  
 No\_of\_seqs 10 out of 12  
 Neff 3.60828  
 Searched\_HMMs 49849  
 Date Fri Jan 24 12:54:45 2020  
 Command hhsearch -cpu 8 -i ../results/full.a3m -d /cluster/toolkit/production/databases/hh-suite/mmcif70/pdb70 -o ../results/9327865\_3.hhr -oa3m ../results/9327865\_3.a3m -p 20 -Z 250 -loc -z 1 -b 1 -B 250 -ssm 2 -sc 1 -seq 1 -dbstrlen 10000 -norealign -maxres 32000 -contxt /cluster/toolkit/production/bioprogs/tools/hh-suite-build/data/context\_data.crf

| No Hit | Prob   | E-value                 | P-value | Score | SS      | Cols | Query | HMM | Template | HMM            |
|--------|--------|-------------------------|---------|-------|---------|------|-------|-----|----------|----------------|
| 1      | 6KC8_A | CRISPR-associated endon | 95.0    | 0.059 | 1.2E-06 | 56.9 | 10.7  | 174 | 18-211   | 845-1033(1083) |
| 2      | 5CZZ_A | CRISPR-associated endon | 94.3    | 0.093 | 1.9E-06 | 55.2 | 9.0   | 161 | 18-184   | 788-980 (1056) |
| 3      | 2ZDO_B | Heme-degrading monooxyg | 73.1    | 35    | 0.0007  | 23.6 | 7.2   | 61  | 98-160   | 6-68 (109)     |
| 4      | 1X7V_A | PA3566 protein; structu | 71.9    | 21    | 0.00041 | 23.4 | 5.3   | 62  | 100-162  | 10-71 (99)     |
| 5      | 6DS7_A | Heme-degrading monooxyg | 70.8    | 28    | 0.00055 | 23.1 | 5.8   | 64  | 98-162   | 3-66 (99)      |

**d** Query C10\_WP\_009541330.1\_\_ID16  
 Match\_columns 415  
 No\_of\_seqs 4 out of 6  
 Neff 1.64058  
 Searched\_HMMs 80583  
 Date Fri Jan 24 13:06:48 2020  
 Command hhsearch -cpu 8 -i ../results/full.a3m -d /cluster/toolkit/production/databases/hh-suite/mmcif70/pdb70 -d /cluster/toolkit/production/databases/hh-suite/pfama/pfama -d /cluster/toolkit/production/databases/hh-suite/NCBI\_CD/NCBI\_CD -o ../results/9327865\_7.hhr -oa3m ../results/9327865\_7.a3m -p 20 -Z 250 -loc -z 1 -b 1 -B 250 -ssm 2 -sc 1 -seq 1 -dbstrlen 10000 -norealign -maxres 32000 -contxt /cluster/toolkit/production/bioprogs/tools/hh-suite-build/data/context\_data.crf

| No Hit | Prob       | E-value                 | P-value | Score | SS      | Cols | Query | HMM | Template | HMM          |
|--------|------------|-------------------------|---------|-------|---------|------|-------|-----|----------|--------------|
| 1      | PF13856.6  | ; Gifsy-2 ; ATP-bind    | 71.9    | 12    | 0.00015 | 28.9 | 3.4   | 27  | 355-382  | 70-96 (99)   |
| 2      | PF05354.11 | ; Phage_attach ; Ph     | 71.0    | 12    | 0.00015 | 30.3 | 3.3   | 27  | 354-380  | 74-100 (117) |
| 3      | 1K0H_A     | gpFII; twisted beta-san | 64.8    | 15    | 0.00018 | 29.9 | 2.6   | 18  | 354-371  | 74-91 (117)  |

Cluster3 Cluster4

**Supplementary Fig. 5. HHpred results of searches using representative members from clusters 7 -a, 8 - b, 9 -c and 10 - d.**

**a****Cluster 1**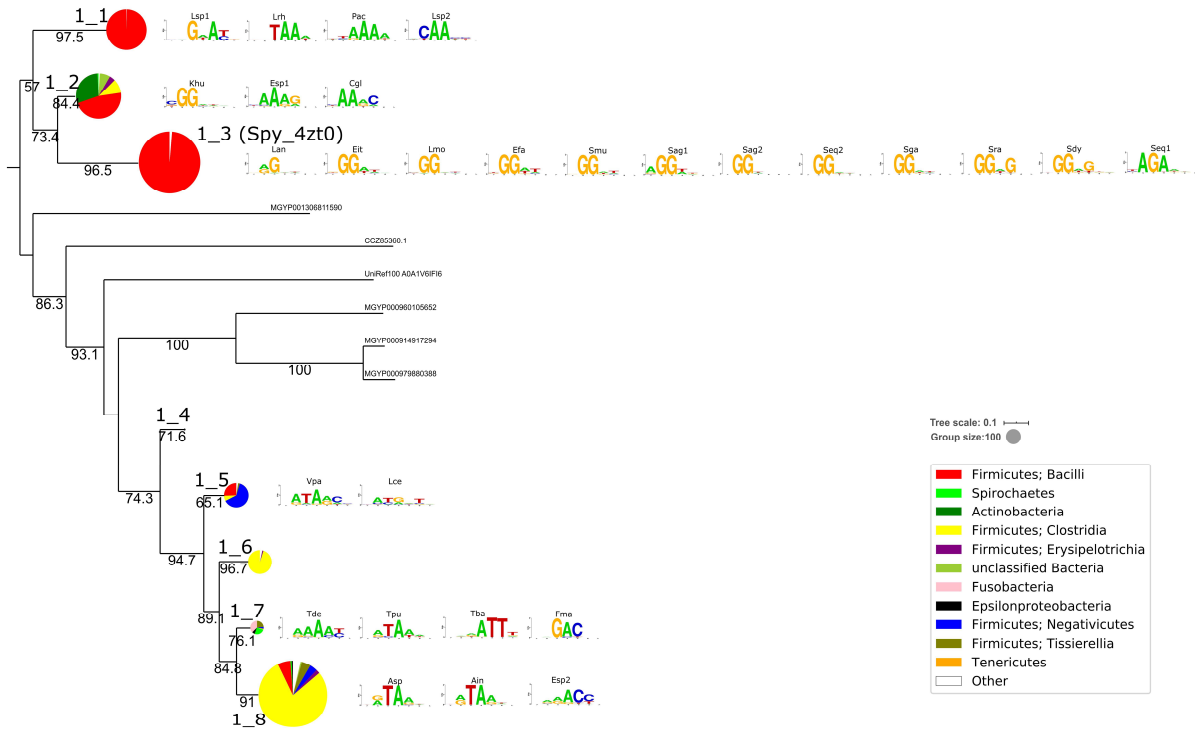**b****Cluster 2**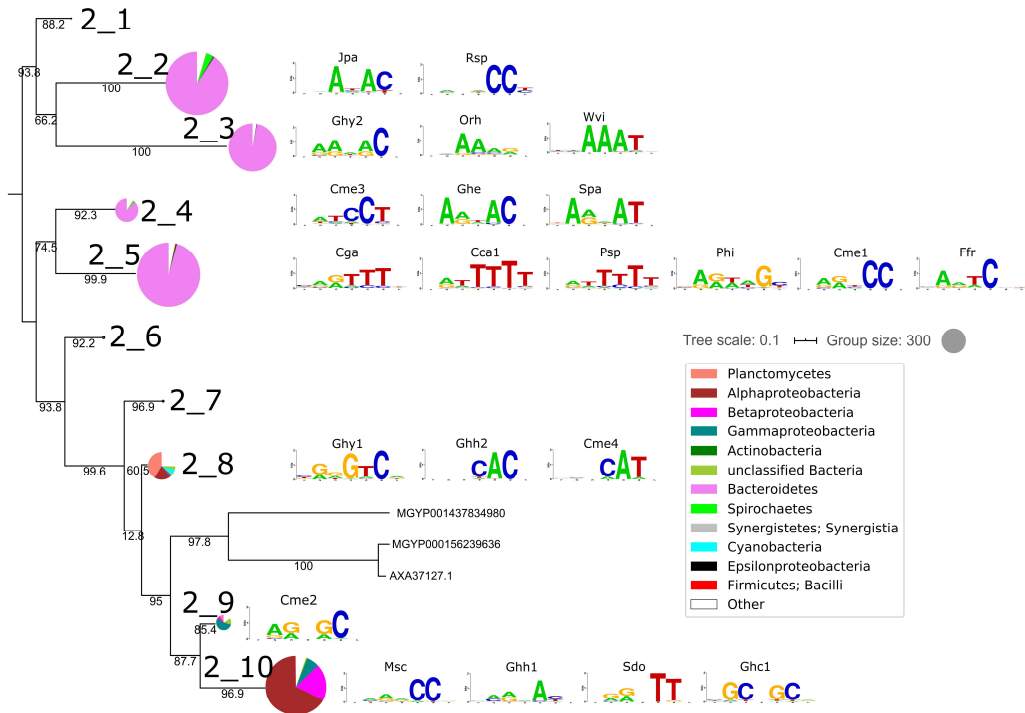

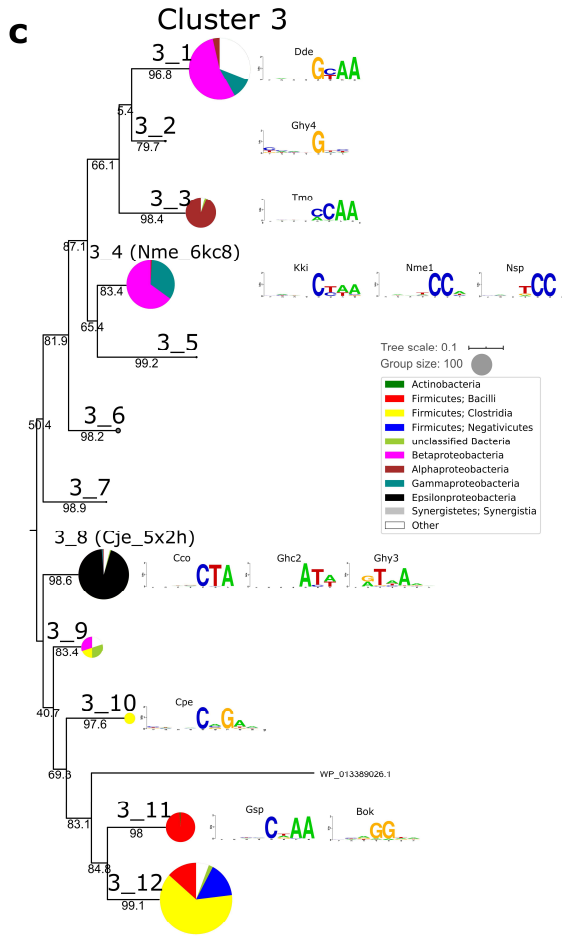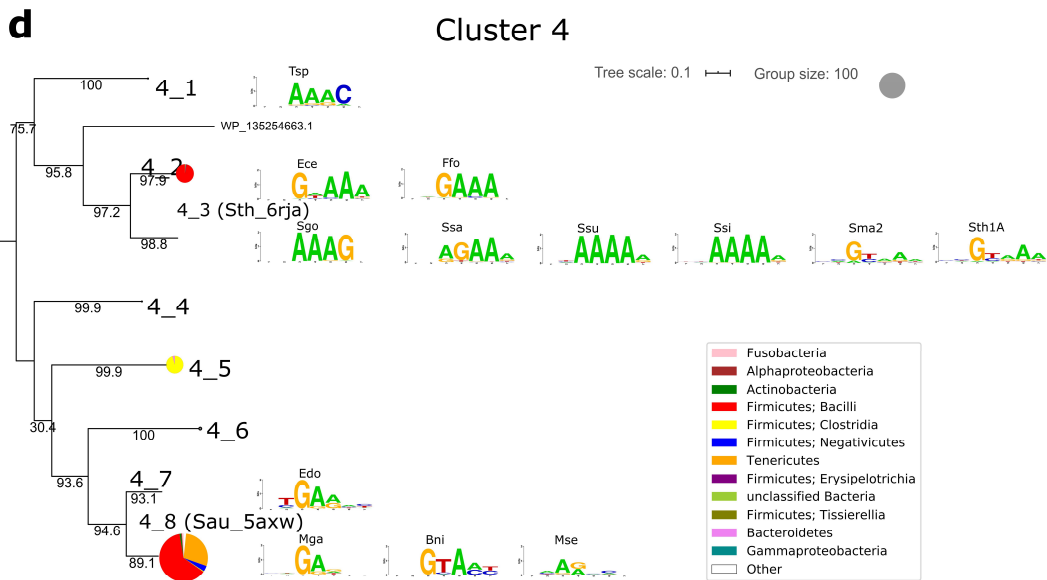



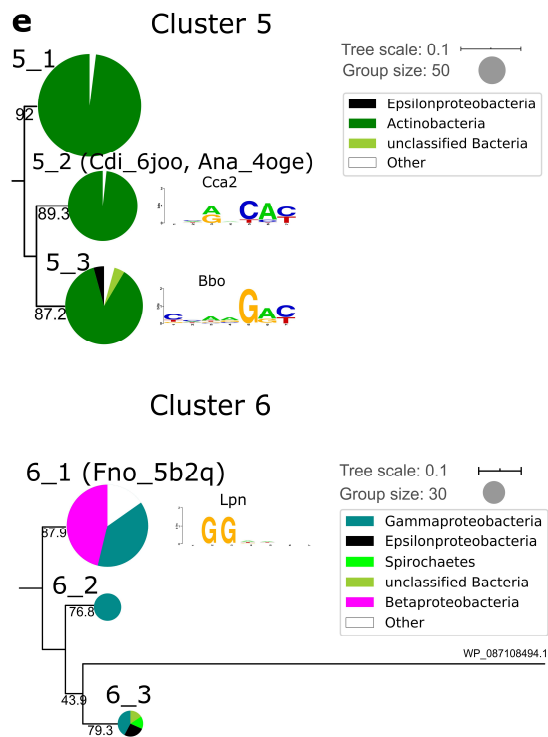

**Supplementary Fig. 6. Phylogenetic tree of PI domains from clusters 1 (a), 2 (b), 3 (c), 4 (d) and 5&6 (e).** SH-aLRT bootstrap values are shown at the branches. Pie charts show taxonomic diversity of groups. Color codes for taxa and scale of a pie chart are provided in each panel.

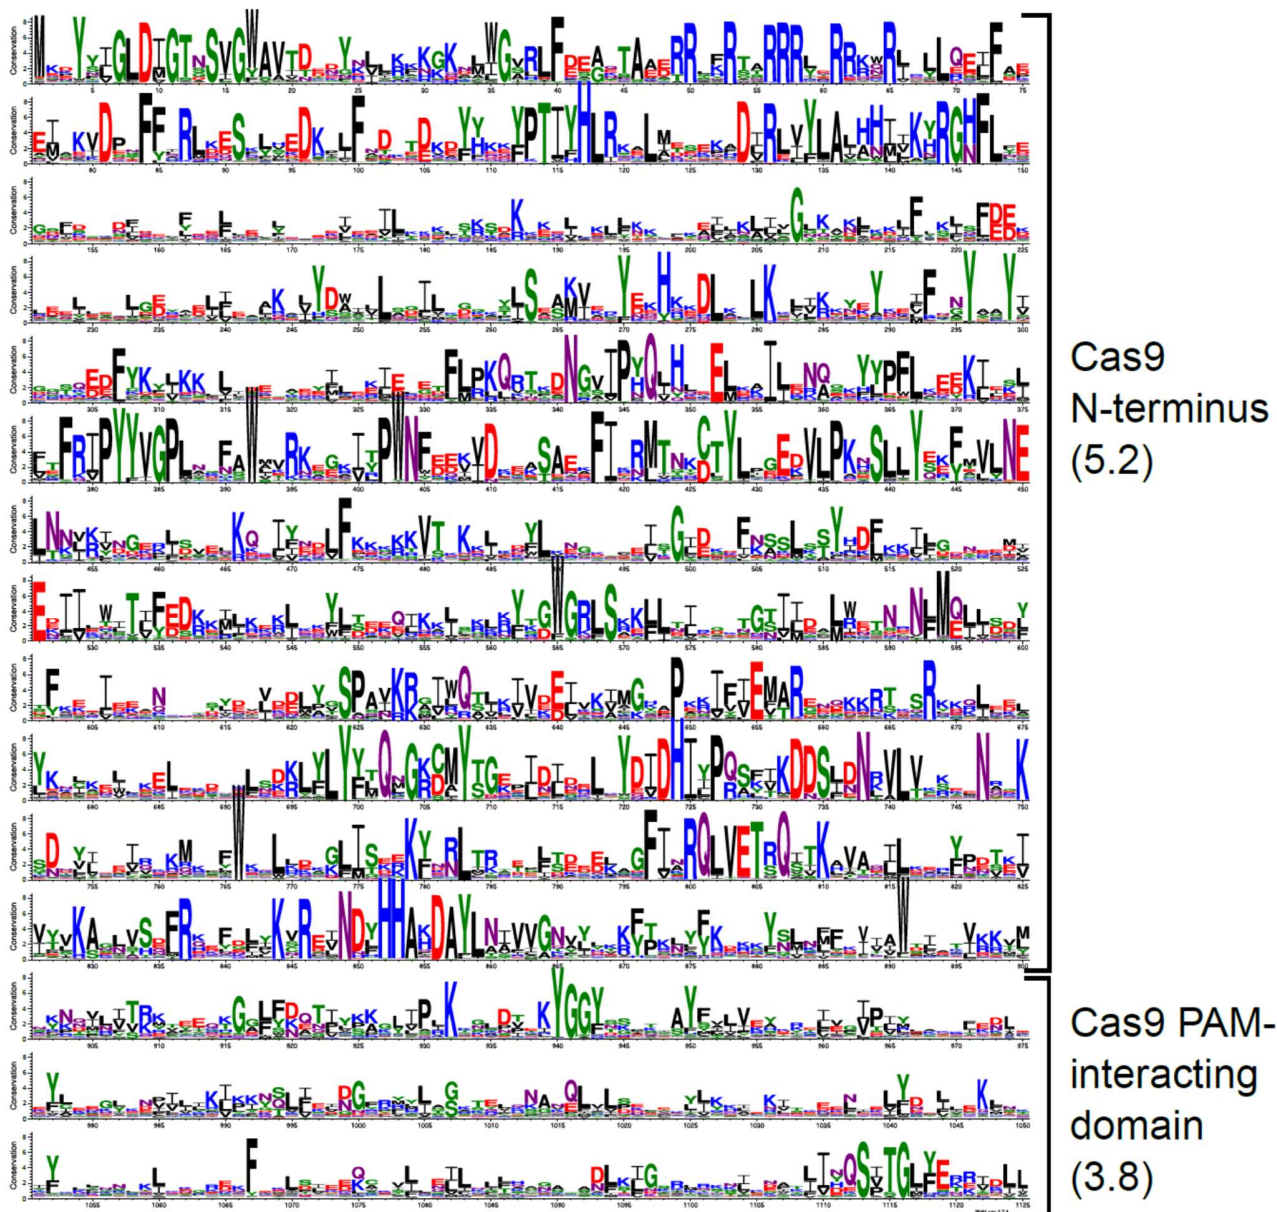

**Supplementary Fig. 7. Weblogo of Spy Cas9 homologs.** Only positions having Jalview conservation score of 1 and higher are shown. Average conservation score is shown in parenthesis. Sequences having all domains characteristic to Spy Cas9 from Cluster 1 (Supplementary Data 3) were used to build the MAFFT alignment.

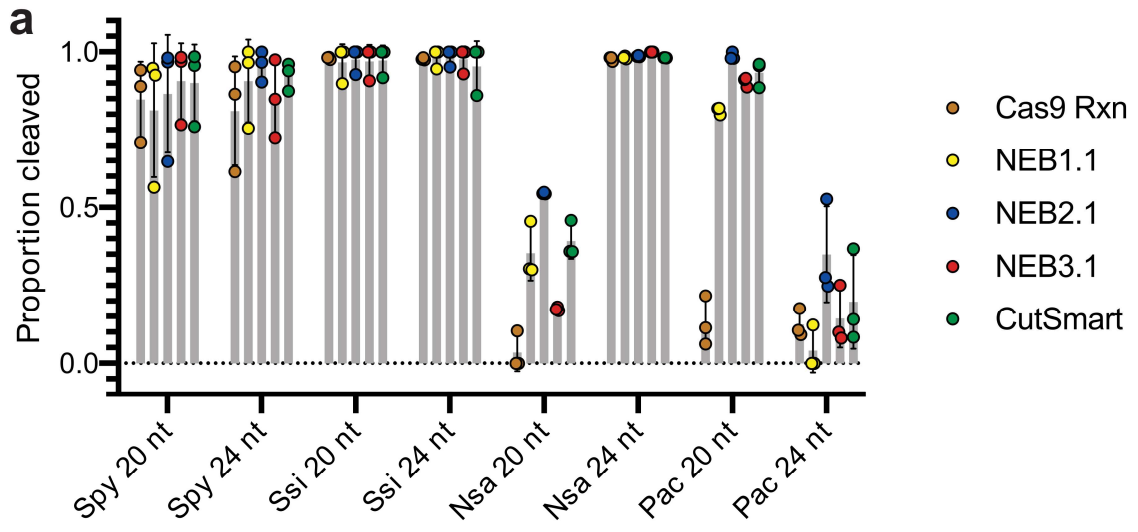

**b**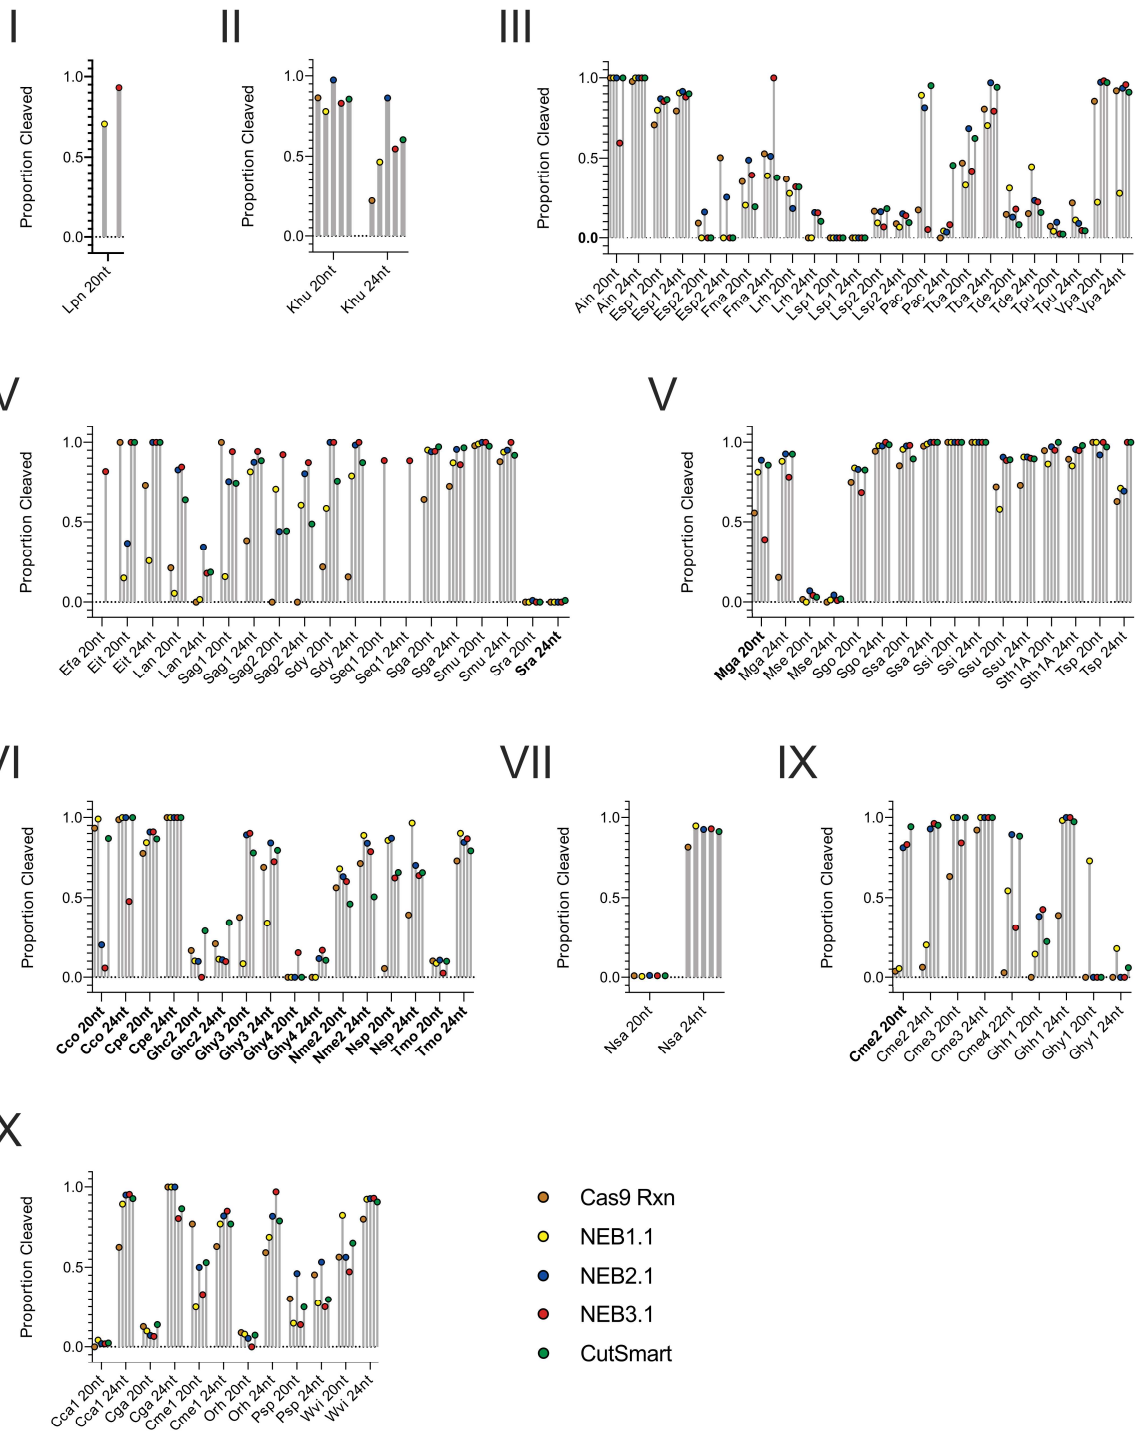

**Supplementary Fig. 8. Spacer length preferences for purified Cas9 orthologs.** **a** The cleavage activity of selected Cas9 orthologs was examined using sgRNAs with 20 or 24 nt spacers. *In vitro* DNA cleavage reactions were performed in different buffers at 37°C (see Methods). Spy and Ssi Cas9 do not have a preference for 20 or 24 nt spacers. Nsa Cas9 has a preference for 24 nt spacers whereas Pac Cas9 has a preference for 20 nt spacers. Data from three independent experiments are shown as points and error bars representing standard deviation. The center of the error bars denotes the mean of the measurements. Brown, yellow, blue, red, and green circles represent reactions performed in Cas9 reaction buffer, NEBuffer 1.1, NEBuffer 2.1, NEBuffer 3.1, or CutSmart buffer, respectively. **b** The *in vitro* DNA cleavage activity of purified Cas9 proteins was screened using 20 and 24 nt spacers. Each point represents one cleavage determination in multiple buffers conditions as indicated by color. Brown, yellow, blue, red, and green circles represent reactions performed in Cas9 reaction buffer, NEBuffer 1.1, NEBuffer 2.1, NEBuffer 3.1, or CutSmart buffer, respectively. Clade membership is indicated by roman numerals.

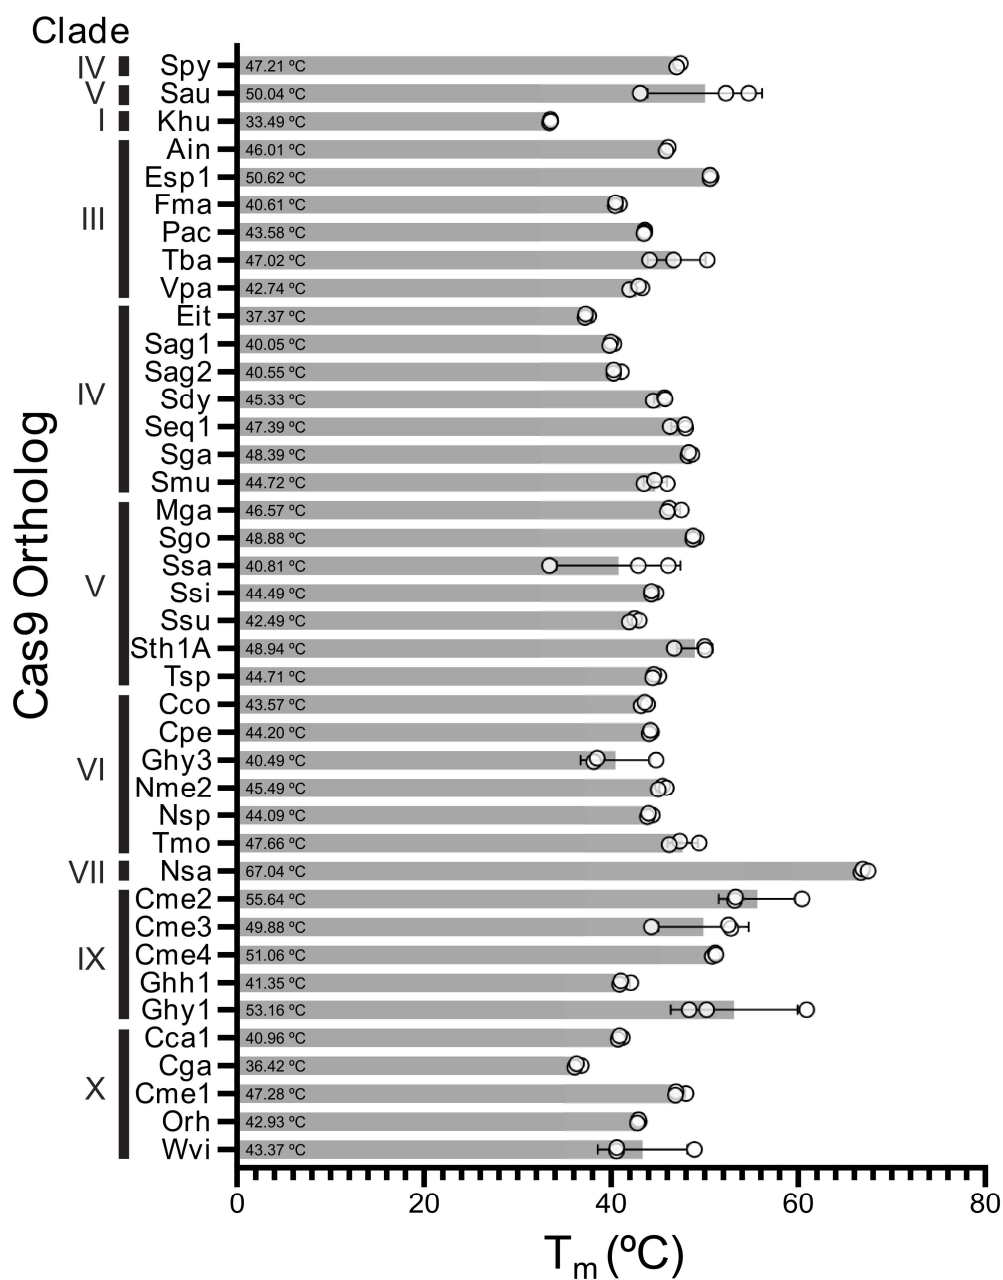

**Supplementary Fig. 9. Thermostability of purified Cas9 proteins.** Melting temperatures of purified Cas9 proteins was determined by nanoDSF (see Methods).  $T_m$  indicated in the histograms represent the mean of 3 independent determinations plotted as open circles. Error bars indicate standard deviation with the center of each denoting the mean of the determinations.

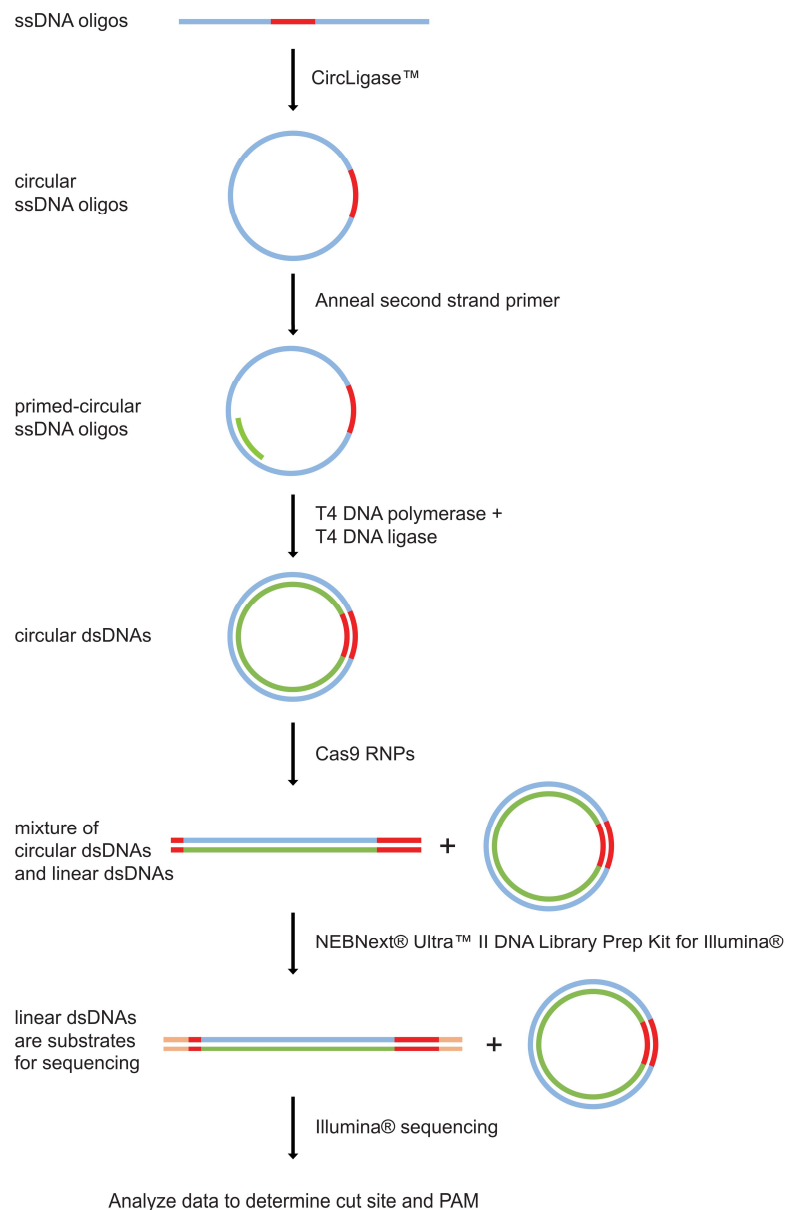

**Supplementary Fig. 10. PAM discovery and cleavage site mapping using purified Cas9 RNP and dsDNA minicircles.** Diagram of workflow to make small circular substrates for PAM and cut site determination assays. Pools of single stranded DNA oligonucleotides (blue) containing a 5' PO<sub>4</sub> ends and 10 nt of randomized sequence (red) were circularized and converted to double stranded circles after annealing a second strand primer (green) and extending it with polymerase in the presence of a ligase. DNA circles are then exposed to Cas9 RNPs containing guide RNA complementary to the DNA sequence flanking the 10 nt randomized sequence region. DNA circles that are cut by the Cas9 are substrates for ligation of adapters (orange) for Illumina sequencing. Custom bioinformatic analysis was used to determine cut site pattern and PAM preference. Control reactions were carried out where each pool of circles was cut with the restriction enzyme BstXI to determine the baseline frequency of nucleotides at every position in the randomized region.







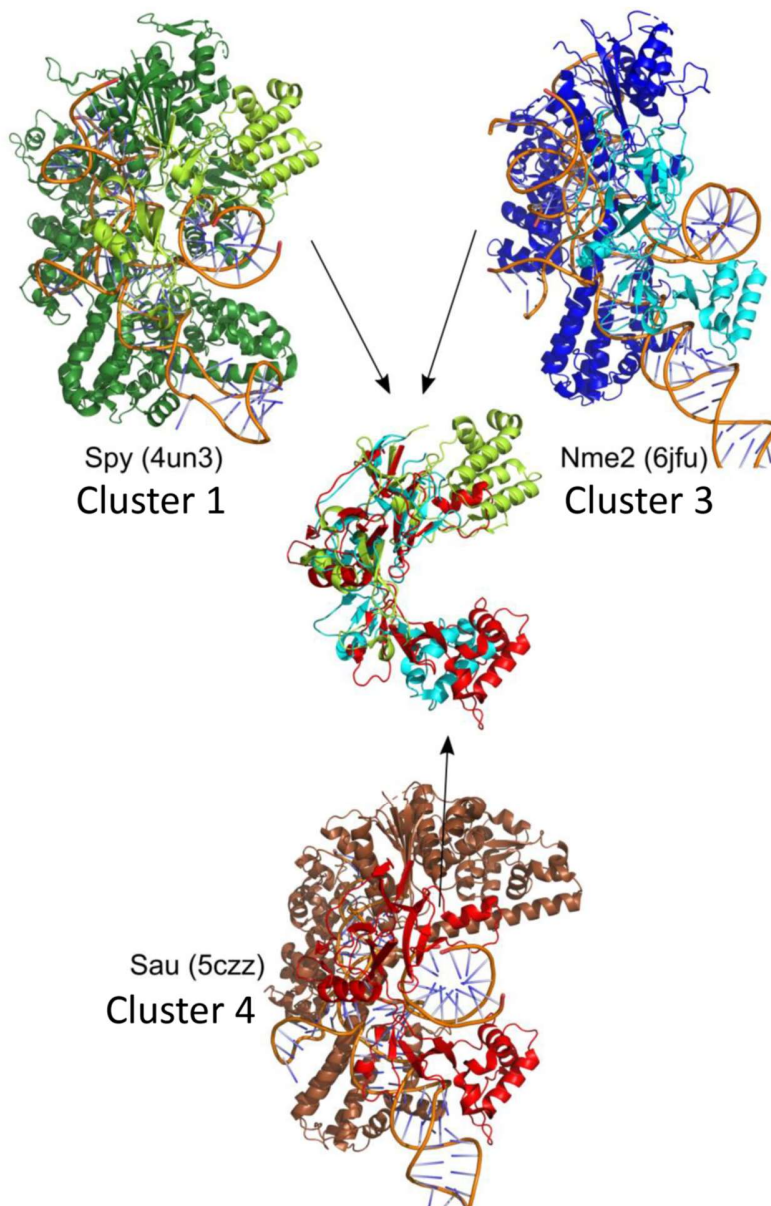

**Supplementary Fig. 12. Comparison of PAM Interacting (PI) domain structures from 3 major clusters (Fig. 3): Spy (4zto), Nmen (6kc8), Sau (5axw).** There are no solved structures of Cas9 proteins with a PI domain associated with cluster 2.

## Supplementary References

1. Darty, K., Denise, A. & Ponty, Y. VARNA: Interactive drawing and editing of the RNA secondary structure. *Bioinformatics* **25**, 1974–1975 (2009).
