# Supplementary material for: A catalogue of biochemically diverse CRISPR-Cas9 orthologs
Source: PubMed Central journal article supplement (PMC7606464; doi:10.1038/s41467-020-19344-1), 2020-11-02
Supplement: 41467_2020_19344_MOESM3_ESM.pdf [file 41467_2020_19344_MOESM3_ESM.pdf]

## **Description of Additional Supplementary Files**

File Name: Supplementary Data 1

Description: Cas9 protein identity matrix.

File Name: Supplementary Data 2

Description: List of analysed Cas9 protein, gene, protein, and sgRNA sequences.

File Name: Supplementary Data 3

Description: Position frequency matrices (PFM) of Cas9 ortholog PAM recognition.

File Name: Supplementary Data 4

Description: List of PAM interaction domain sequences and cluster information.

File Name: Supplementary Data 5

Description: Target DNA cleavage patterns produced by Cas9 orthologs.

File Name: Supplementary Data 6

Description: List of Cas9 protein sequences used to construct the phylogenetic tree.

File Name: Supplementary Data 7

Description: Sequences of oligonucleotides and substrates used for this study.
